# Supplementary material for: Ligand exchange upon oxidation of a dinuclear Mn complex–detection of structural changes by FT-IR spectroscopy and ESI-MS
Source: Royal Society of Chemistry journal article supplement (doi:10.1039/b415148h), 2005-01-01
Supplement: b415148h.pdf [file b415148h.pdf]

Supporting information for

---

**Ligand exchange upon Oxidation of a Dinuclear Mn complex – Detection of Structural Changes by FT-IR Spectroscopy and ESI-MS**

---

Gerriet Eilers<sup>a</sup>, Camilla Zettersten<sup>b</sup>, Leif Nyholm<sup>b†</sup>, Leif Hammarström<sup>a</sup>, and Reiner Lomoth<sup>\*a</sup>

<sup>a</sup> Department of Physical Chemistry, Uppsala University, BOX 579, S-75123, Uppsala, Sweden.

E-mail: Reiner.Lomoth@fki.uu.se

<sup>b</sup> Department of Analytical Chemistry, Uppsala University, BOX 599, S-75124, Uppsala, Sweden.

† Current address: Department of Materials Chemistry, Uppsala University, BOX 538, S-75121, Uppsala, Sweden.

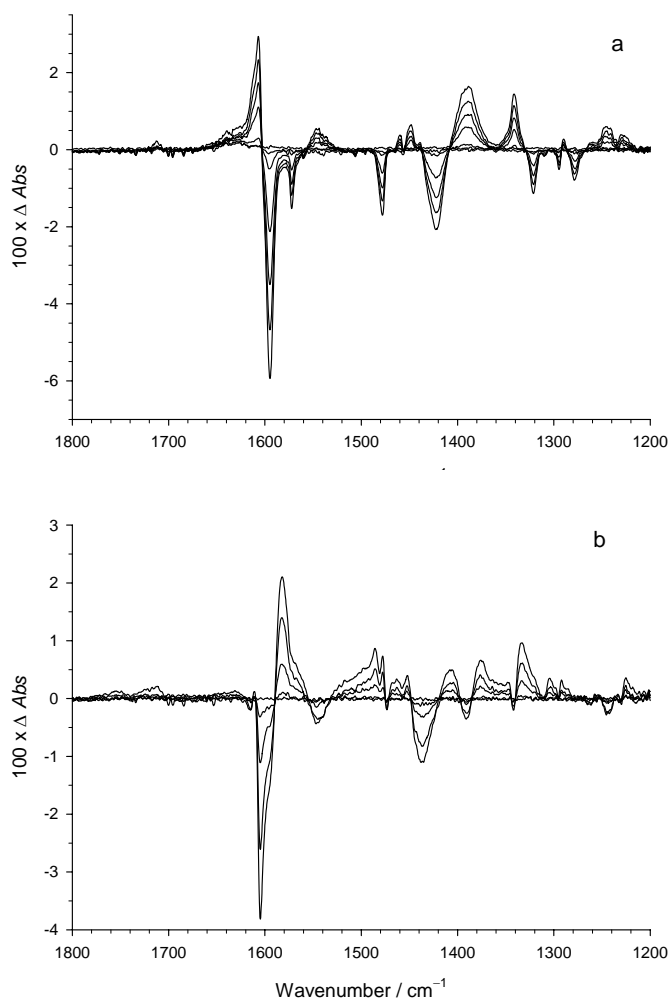

**Figure S1.** Spectroelectrochemical changes upon oxidation of  $[\text{Mn}_2^{\text{II,II}}(\text{bpmp})(\mu\text{-OAc})_2]^+$  (3 mM) in  $\text{CD}_3\text{CN}$  with 0.5 M  $\text{KPF}_6$ . Electrolysis at 0.32 V (a) and successive electrolysis at 0.82 V (b).

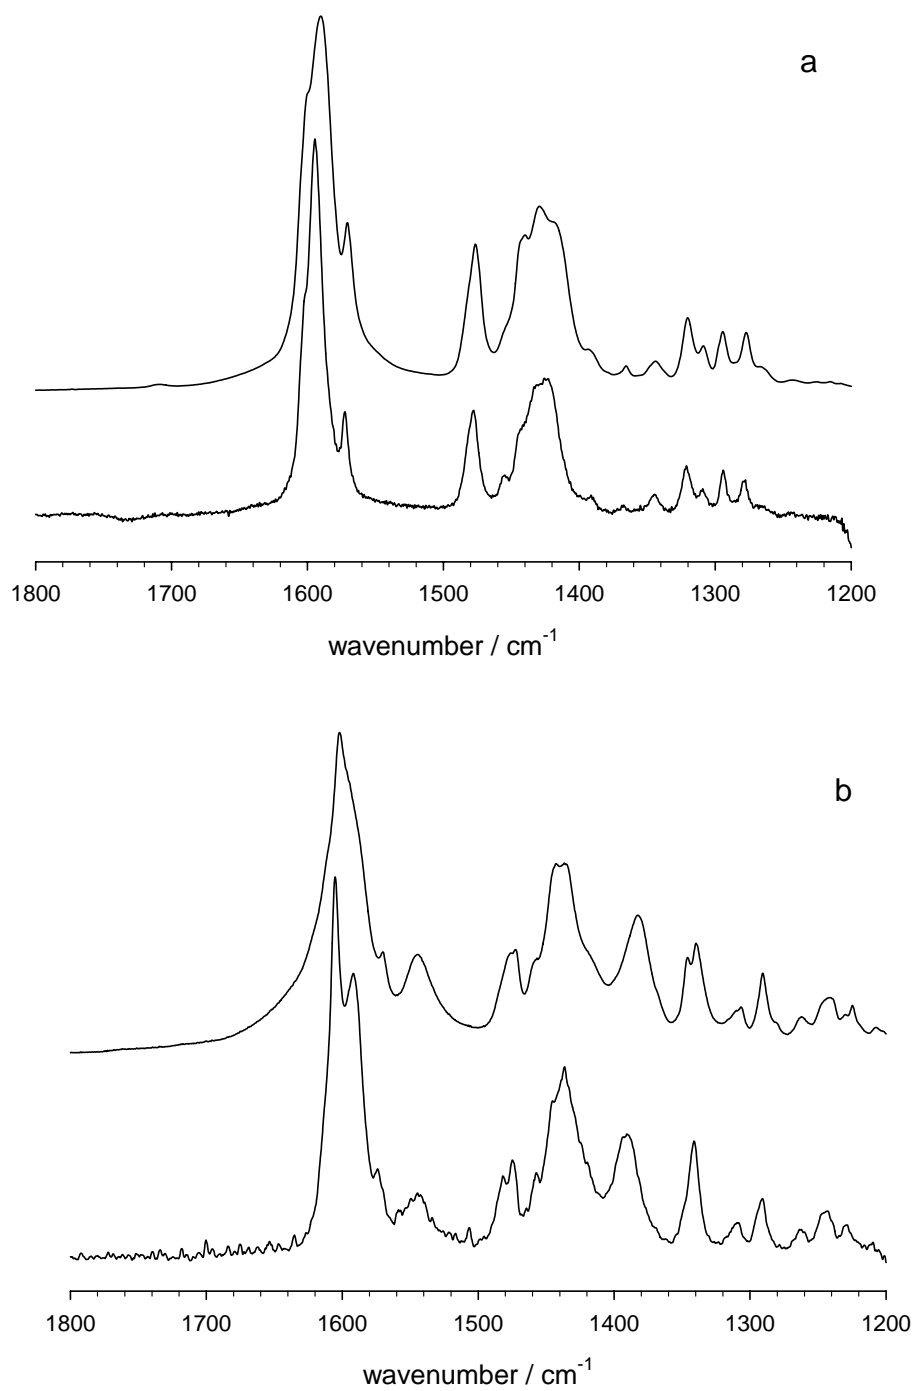

**Figure S2.** IR spectra of [Mn<sub>2</sub><sup>II,II</sup>(bmp)(μ-OAc)<sub>2</sub>][ClO<sub>4</sub>] (a) and [Mn<sub>2</sub><sup>II,III</sup>(bmp)(μ-OAc)<sub>2</sub>][ClO<sub>4</sub>]<sub>2</sub> (b) as solid (top spectra) and in CD<sub>3</sub>CN solution (bottom spectra).

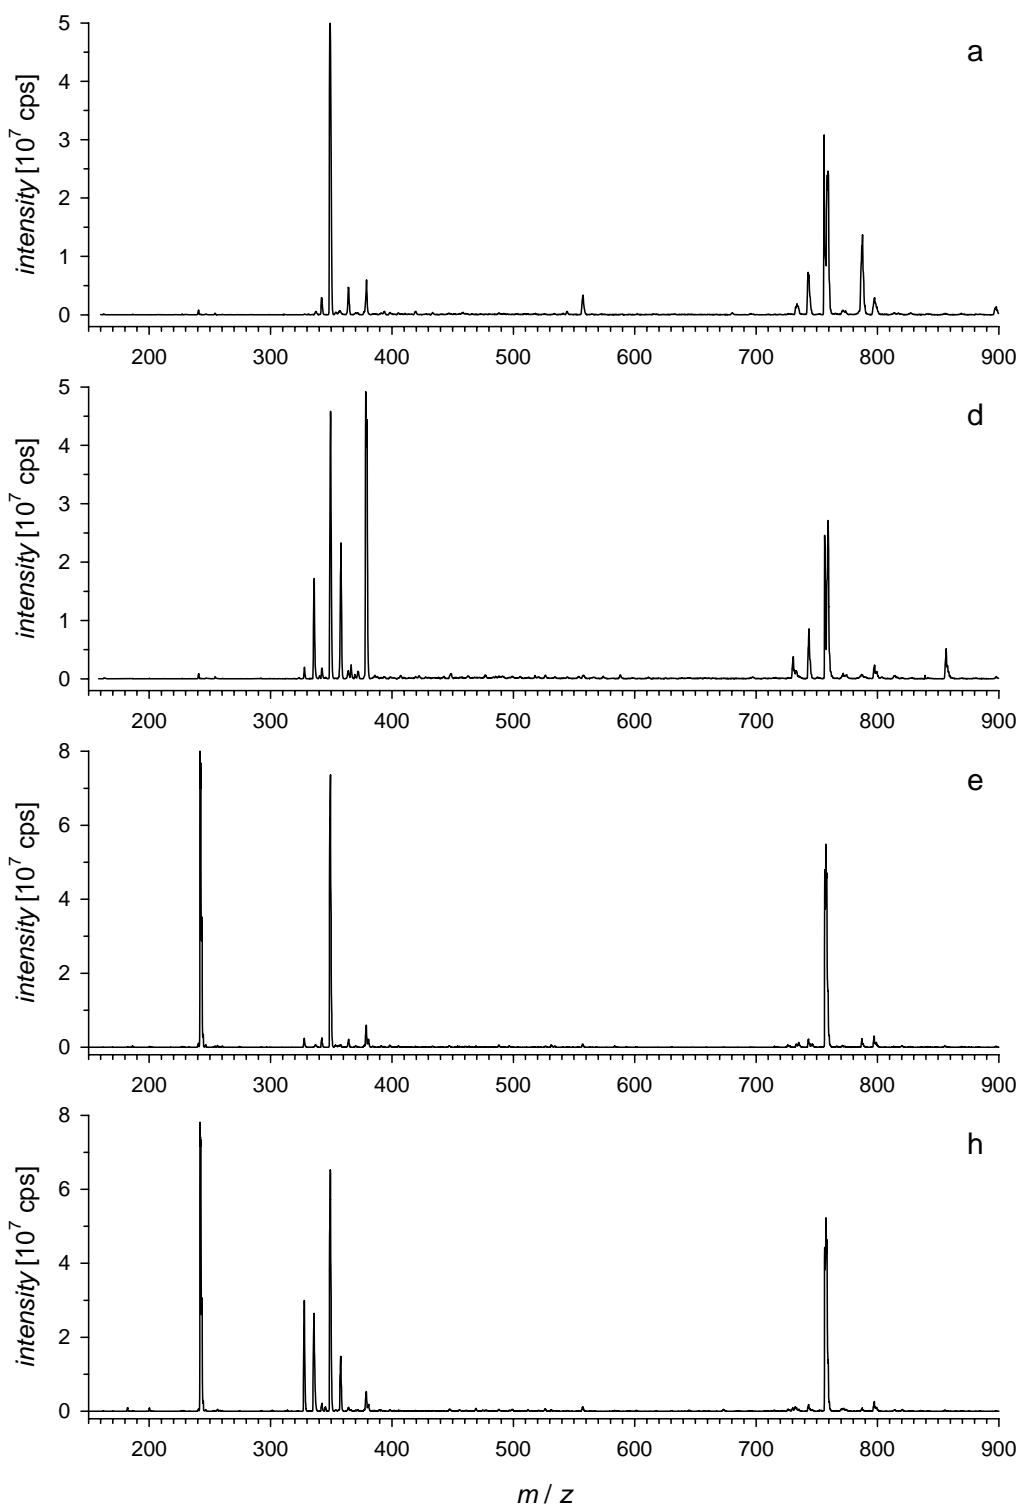

**Figure S3.** Selected full range EC-ESI-MS spectra of  $[\text{Mn}_2^{\text{II,II}}(\text{bpmp})(\mu\text{-OAc})_2]^+$  ( $45 \mu\text{M}$ ) in  $\text{CH}_3\text{CN}$  without applied potential (a), and  $1.2 \text{ V}$  (d) applied to the EC cell. Mass spectra of  $[\text{Mn}_2^{\text{II,II}}(\text{bpmp})(\mu\text{-OAc})_2]^+$  ( $97 \mu\text{M}$ ) in  $\text{CH}_3\text{CN}$  with  $10\%$  (v:v)  $\text{H}_2\text{O}$  without applied potential (e) and with  $0.6 \text{ V}$  (h) applied to the EC cell.
